# Supplementary material for: One methyl group makes a major difference: shape-selective catalysis by zeolite nanoreactors in liquid-phase condensation reactions
Source: Royal Society of Chemistry journal article supplement (doi:10.1039/c7ta04187j), 2017-01-01
Supplement: c7ta04187j1.pdf [file c7ta04187j1.pdf]

## Electronic Supplementary Information

### One Methyl Group Makes Major Difference: Shape-Selective Catalysis by Zeolite Nanoreactor in Liquid-Phase Condensation Reactions

Chang Liu, Changyan Cao\*, Jian Liu, Xiaoshi Wang, Yanan Zhu and Weiguo Song\*

<sup>a</sup> Beijing National Laboratory for Molecular Sciences, Laboratory for Molecular Nanostructures and Nanotechnology, CAS Research/Education Center for Excellence in Molecular Sciences, Institute of Chemistry, Chinese Academy of Sciences, Beijing 100190, China

<sup>b</sup> University of Chinese Academy of Sciences, Beijing 100049, China

E-mail: [cycas@iccas.ac.cn](mailto:cycas@iccas.ac.cn); [wsong@iccas.ac.cn](mailto:wsong@iccas.ac.cn)

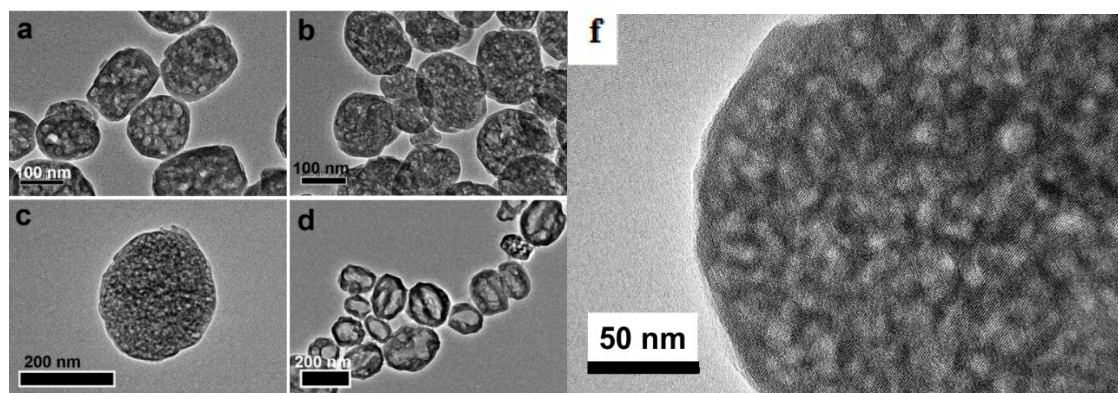

**Fig. S1** TEM images of HS-1 treated with different concentration of APTMS solution: (a) 0.164 M; (b) 0.205 M; (c) 0.246 M; (d) 0 M; (f) High-magnification of PHS-1

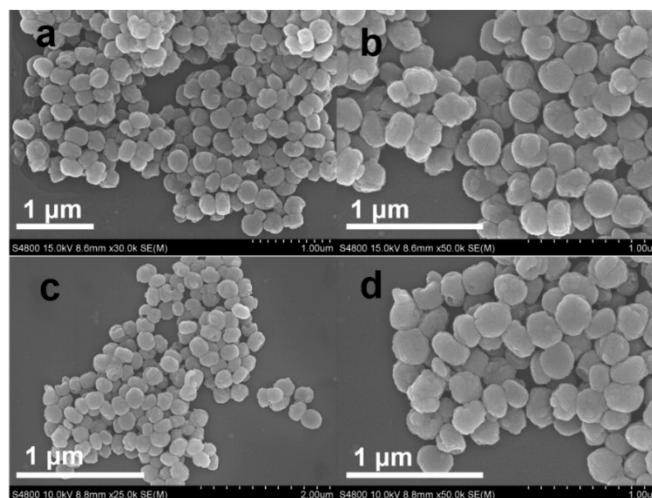

**Fig. S2** SEM images (a), (b) of PHS-1; SEM images (c), (d) of S-1

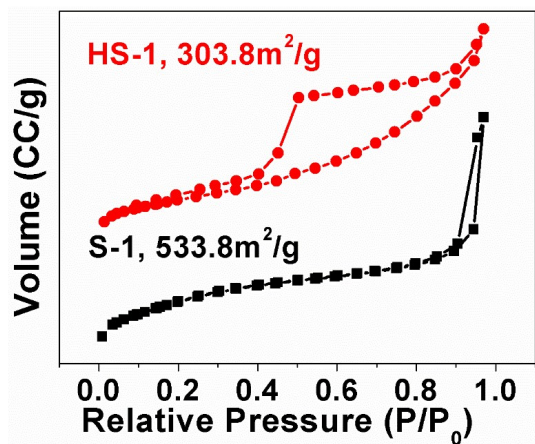

Fig. S3 Nitrogen adsorption-desorption isotherms of S-1 and HS-1

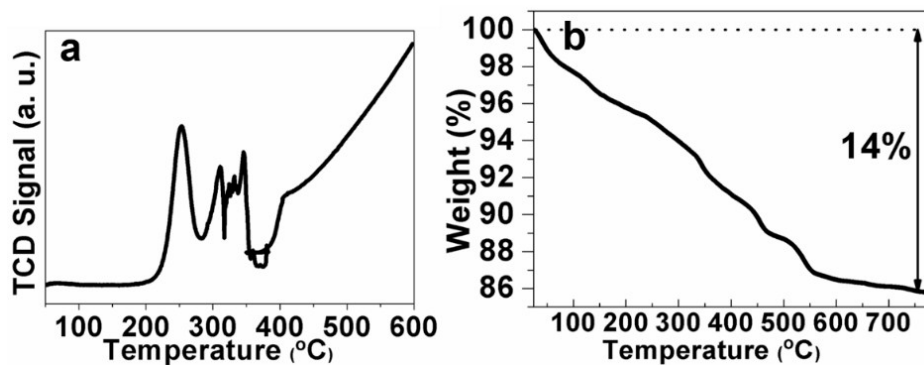

Fig. S4 (a) Carbon dioxide TPD spectra of the polymer; (b) TG curves of PHS-1

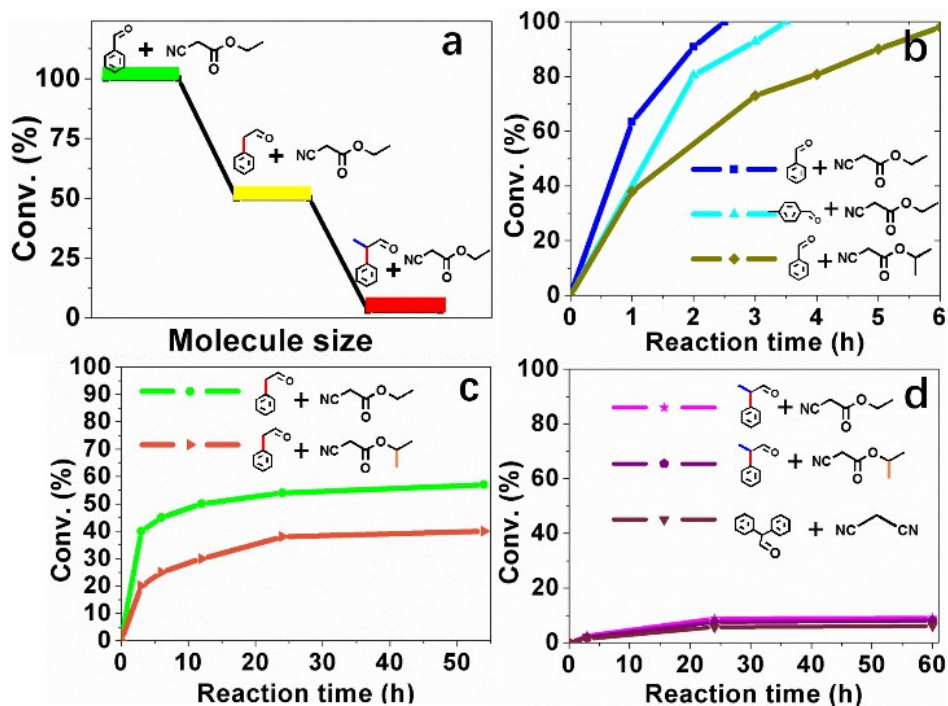

Fig. S5 (a) Three-groups of reactions; Curves of conversion vs time of (b) First group reaction; (c) Second group reaction and (d) Third group reaction.

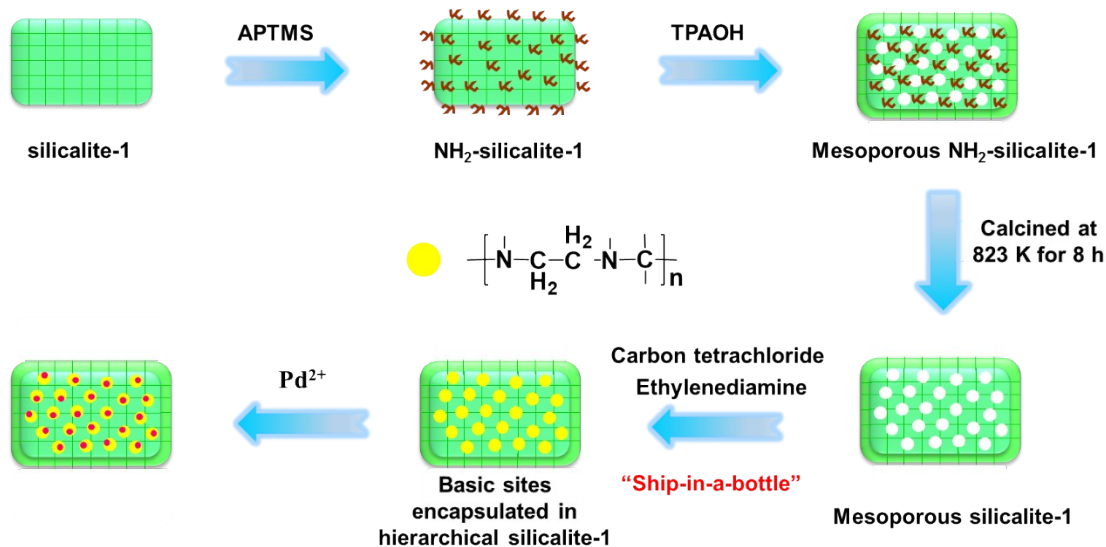

**Scheme S1** Synthesis route of Pd nanoparticles loaded on polymers inside silicalite-1 zeolite shell (Pd/PHS-1).

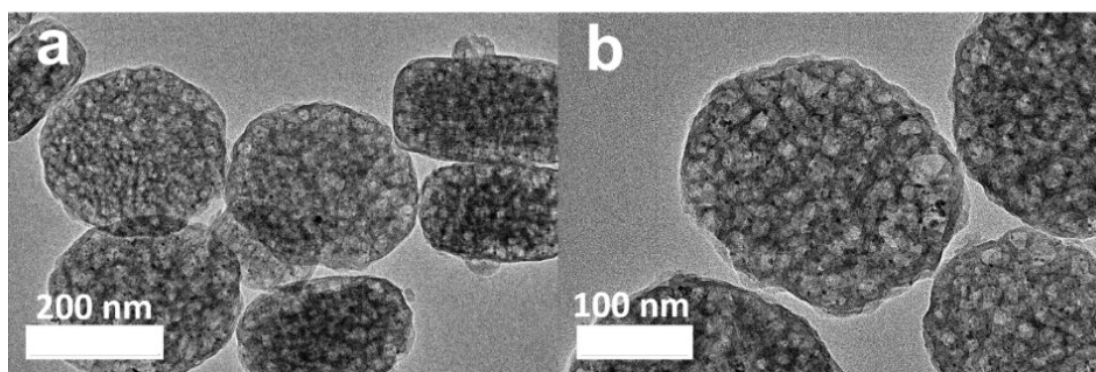

**Fig. S6** (a-b) TEM images of Pd/PHS-1

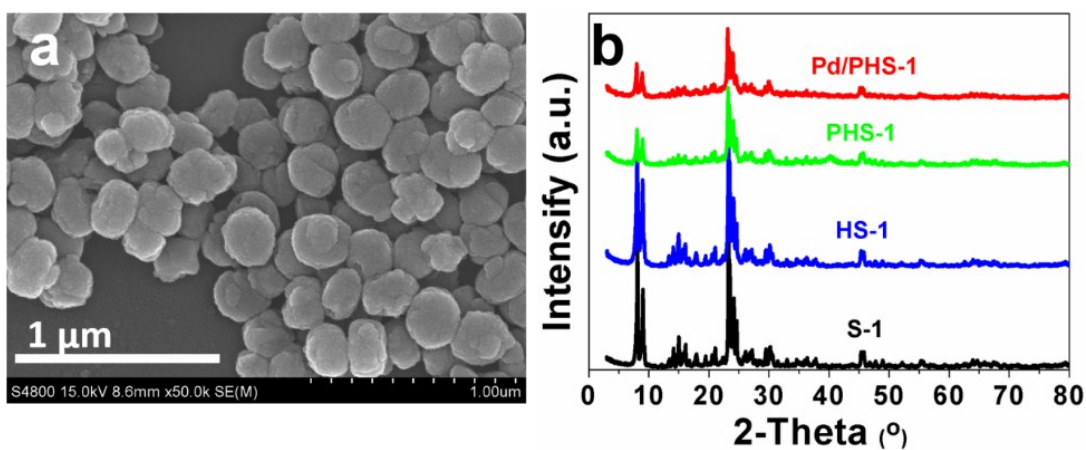

**Fig. S7** (a) SEM image of Pd/PHS-1; (b) XRD patterns of S-1, HS-1, PHS-1 and Pd/PHS-1
